# Supplementary material for: Reversible response of poly(aspartic acid) hydrogels to external redox and pH stimuli
Source: Royal Society of Chemistry journal article supplement (doi:10.1039/c3ra47530a), 2014-01-01
Supplement: c3ra47530a.pdf [file c3ra47530a.pdf]

# **Reversible response of poly(aspartic acid) hydrogels to external redox and pH stimuli**

## **Electronic supporting information (ESI)**

**Benjámín Gyarmati, Árpád Némethy and András Szilágyi\***

### **Experimental parameters of Ellman's assay**

Calibration for Ellman's assay was performed by measuring thiol concentration of solutions of cysteamine hydrochloride with different concentrations. The experimental parameters were the following: 1800  $\mu\text{l}$  of buffer solution (aqueous buffer solution at pH = 8: 0.1 M imidazole, 1 mM EDTA; nitrogen was bubbled through the solution for 15 min to remove oxygen), 180  $\mu\text{l}$  aqueous solution of cysteamine hydrochloride and 20  $\mu\text{l}$  of 10 mM aqueous solution of Ellman's reagent were measured into a 2 ml Eppendorf tube. The tube was incubated at 37 °C for 15 min to complete the reaction. UV-spectra (Analytic Jena Specord 200 spectrophotometer, Germany) were recorded immediately after the reaction. The peak at 405 nm was used for further evaluation. (Equation of calibration curve:  $A = 1.161 C_{\text{SH}} + 0.0447$ ,  $R^2 = 0.9988$ ,  $n = 5$ ).
